# Supplementary material for: A Thylakoid Membrane Protein Functions Synergistically with GUN5 in Chlorophyll Biosynthesis
Source: PubMed Central journal article supplement — Plant Commun. 2020 Jul 3;1(5):100094. doi: 10.1016/j.xplc.2020.100094 (PMC7747962; doi:10.1016/j.xplc.2020.100094), 2020-07-03
Supplement: mmc1.pdf [file mmc1.pdf]

**Plant Communications, Volume 1**

**Supplemental Information**

**A Thylakoid Membrane Protein Functions Synergistically with GUN5 in  
Chlorophyll Biosynthesis**

**Chi Zhang, Bin Zhang, Baicong Mu, Xiaojiang Zheng, Fugeng Zhao, Wenzhi Lan, Aigen Fu, and Sheng Luan**

1 Supplemental Materials

2

3

4

5

6

7

8

9

10

11

12

13

14

15

16

17

18

19

20

21

22

23

24

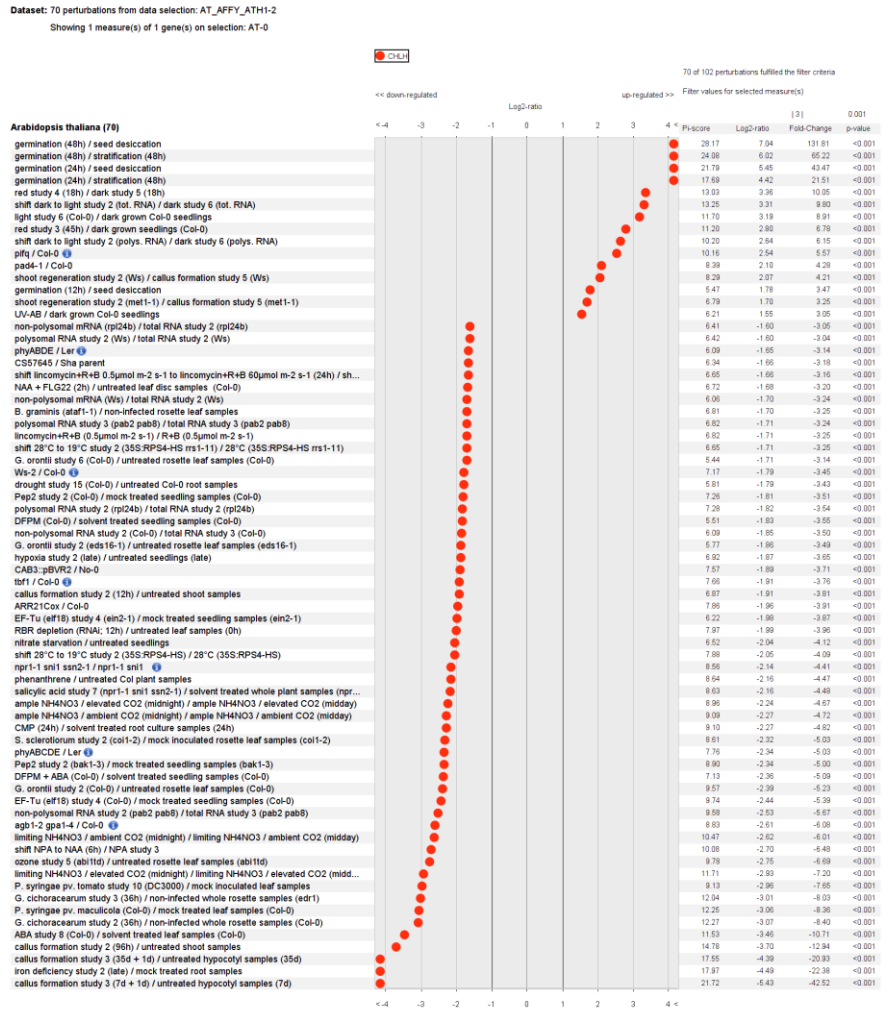

Supplemental Figure 1. Expression Profiles of *CHLH/GUN5* under Perturbation Conditions.

The dataset were 70 perturbations which the expression profiles of *CHLH/GUN5* were most regulated. Data were collected from the Genevestigator database.

25  
26  
27  
28  
29  
30  
31  
32  
33  
34  
35  
36  
37  
38

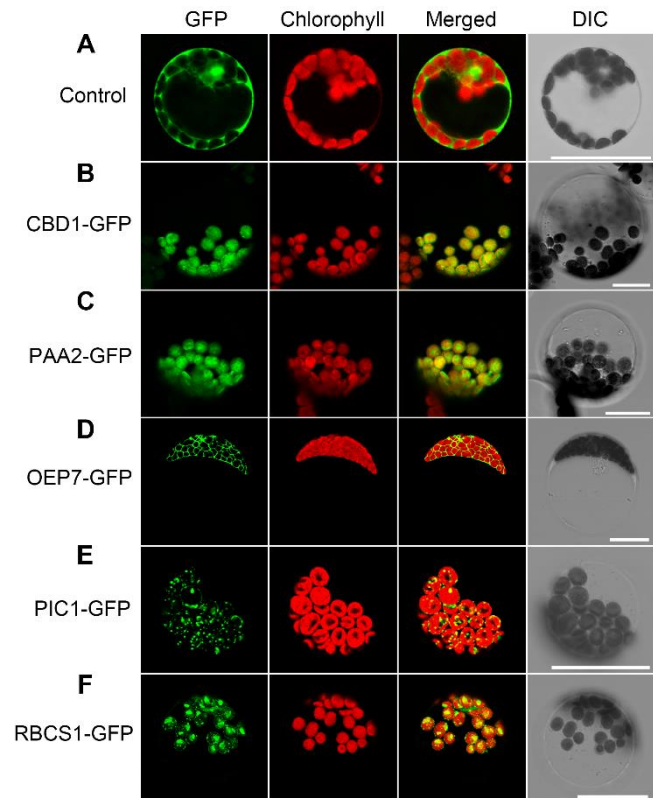

39 **Supplemental Figure 2. Subcellular Localization of CBD1 and Marker Proteins**  
40 **in Chloroplast.**

41 *Arabidopsis* leaf protoplasts were transformed with plasmids that express the  
42 indicated gene constructs under control of the constitutive 35S Cauliflower mosaic  
43 virus promoter. **(A)** The unfused GFP vector served as a control. **(B)** The GFP coding  
44 sequence was fused to the C terminus of the CBD1 coding region in the pEZSNL  
45 vector. **(C-F)** Fluorescence signals of marker proteins localized in different  
46 compartments of chloroplast. PAA2-GFP, PIC1-GFP, OEP7-GFP, and RBCS1-GFP  
47 were used as markers of thylakoid membrane, inner envelope, outer envelope, and  
48 stroma respectively. After 16 h of expression, protoplasts were observed using a  
49 confocal laser scanning microscope. Green fluorescence signals, chlorophyll red  
50 auto-fluorescence, merged signals from GFP and chlorophyll channels, and  
51 bright-field images that showed intactness of the protoplasts are shown separately  
52 from left to right in each lane. Scale bars, 20  $\mu$ m.

53  
54

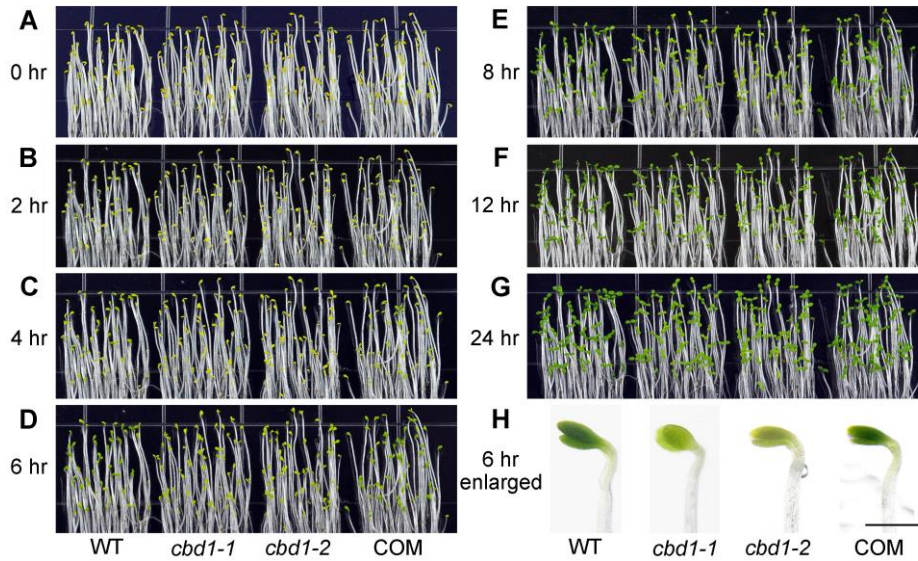

55

56

57 **Supplemental Figure 3. *cbd1* Exhibited a Slower Rate in Chl Biosynthesis.**

58 (A) to (G) 3-day-old dark-grown etiolated WT, *cbd1-1*, *cbd1-2*, and COM seedlings

59 exposed to continuous light for indicated time periods. Scale bar, 1 cm. (H) Enlarged

60 representative WT, *cbd1-1*, *cbd1-2*, and COM seedling after light exposure for 6 h.

61 Scale bar: 1 mm.

62

63

64

65

66

67

68

69

70

71

72

73

74

75

76

77

78

79

80

81

82

83

84

85

86

87

88

89

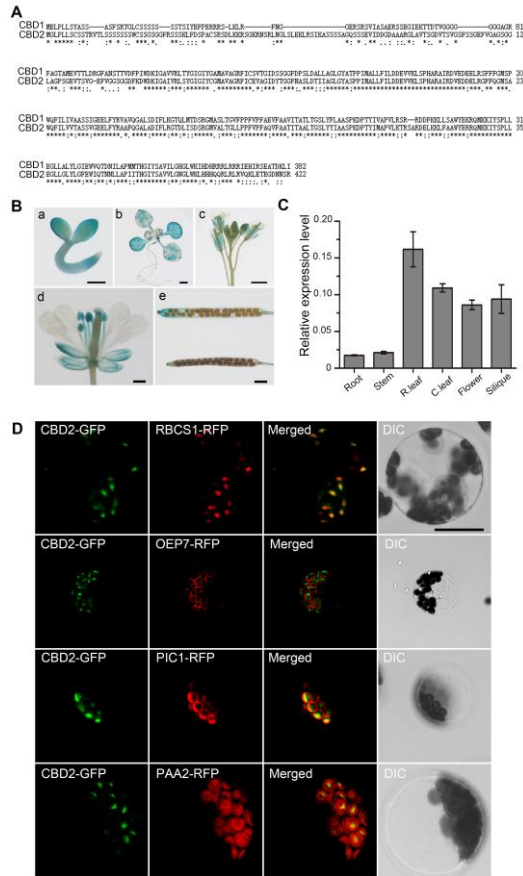

90 **Supplemental Figure 4. Expression Profiles of *CBD2* and Subcellular**  
91 **Localization of *CBD2*.**

92 (A) Sequence alignment of CBD1 and CBD2 using Clustal X. (B) GUS staining of  
93 (a-c) 1-3 days old seedlings after germination, (d) Inflorescence and silique from  
94 4-week-old plants, and (e) Rosette leaf from 3-week-old plants in soil. Scale bars, 200  
95 μm in (a) and (b), 1 mm in (c) and (f), 2 mm in (d) and (e). Data are mean ± SD. n = 4.  
96 (C) Relative expression levels of *CBD2* in various tissues are revealed by qRT-PCR  
97 analysis. (D) The construct of *35S::CBD2-GFP* was co-transformed with the marker  
98 RBCS1-RFP (stroma), OEP7-RFP (outer envelope), PIC1-RFP (inner envelope), or  
99 PAA2-RFP (thylakoid membrane) into *Arabidopsis* leaf protoplasts for fluorescence  
100 observation using confocal laser scanning microscope after 16 h of expression. Green  
101 fluorescence signals, chlorophyll red auto-fluorescence, merged signals from GFP and  
102 chlorophyll channels, and bright-field images that showed intactness of the  
103 protoplasts are shown separately from left to right in each lane. Scale bar, 20 μm.

104

105

106

107

108

109

110

111

112

113

114

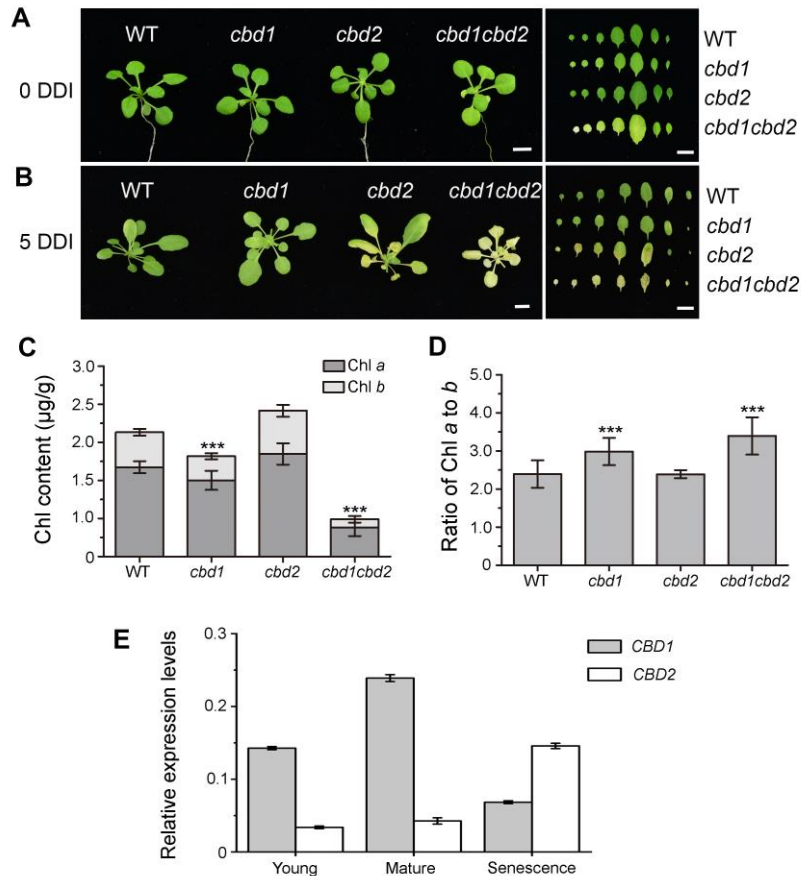

115 **Supplemental Figure 5. Phenotypic Analysis of WT, *cbd1*, *cbd2*, and *cbd1cbd2***  
 116 **Mutants.**

117 (A) 3-week-old WT, *cbd1*, *cbd2*, and *cbd1cbd2* mutant grown in normal conditions.  
 118 Detached leaves were shown in the right. (B) 3-week-old WT, *cbd1*, *cbd2*, and  
 119 *cbd1cbd2* mutant were dark incubated for 5 days. Detached leaves were shown in the  
 120 right. Scale bars, 1 cm. (C) Chlorophyll content and (D) ratio of Chl *a* to *b* of  
 121 seedlings in (A) (Student's *t* test, \*\*\*  $P < 0.001$ ). (E) Relative expression levels of  
 122 *CBD1* and *CBD2* in leaves of different ages were detected by qRT-PCR analysis.  
 123 Young leaves: the two leaves that newly emerged; mature leaves: the middle leaves;  
 124 senescence leaves: the two true leaves close to the base of plants.

125

126

127

128

129

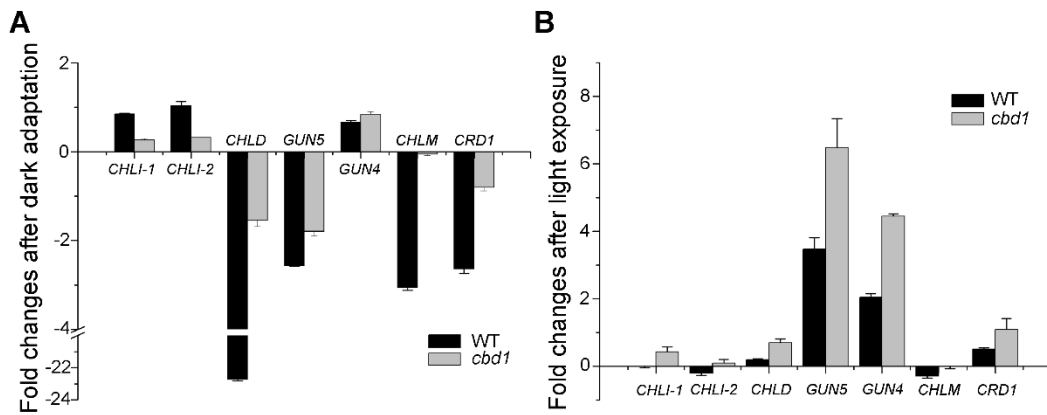

131 **Supplemental Figure 6. Altered Expression Levels of Genes Encoding Key**  
 132 **Enzymes in Chl Biosynthetic Pathway.**

133 (A) 3-week-old WT and *cbd1* were dark-adapted for 1 hour before harvest. (B)  
 134 Dark-grown WT and *cbd1* were harvested after 1 hour light exposure. Data are mean  
 135  $\pm$ SD, n=4. *Actin2* was used as an internal reference.

136

137

138

139

140

141

142

143

144

145

146

147

148

149

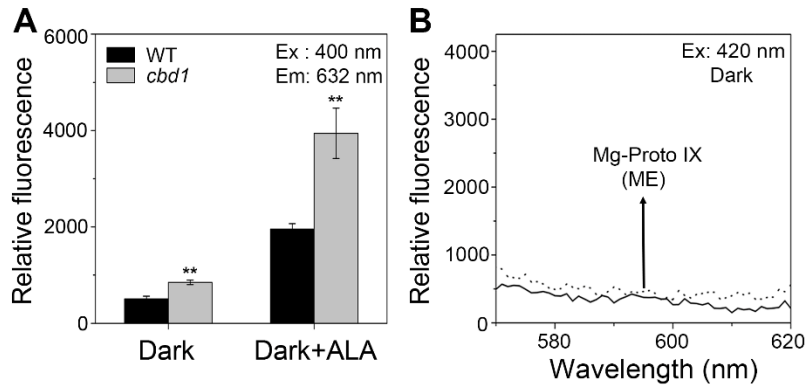

150

151

152 **Supplemental Figure 7. Spectrofluorometric analysis of Chl precursors.**

153 (A) Levels of Proto IX in dark-adapted WT and *cbd1* seedlings are determined by  
 154 spectrofluorometry. 3-week-old seedlings were dark-adapted for 3 days before  
 155 harvested for measurement. For ALA treatment, 10 mM ALA was added. Excitation at  
 156 400 nm produces an emission peak at 632 nm corresponding to the Proto IX content.

157 (B) In dark-adapted seedlings, excitation at 420 nm did not produce an emission peak  
 158 at 595 nm, indicating that the no Mg-Proto IX (ME) was detected by  
 159 spectrofluorometry in this condition. Data are mean  $\pm$  SD. n=4. Asterisks indicate  
 160 statistically significant differences compared with the wild type (Student's *t*-test,  
 161 \*\* $P < 0.01$ ).

162

163

164

165

166

167

168

169

170

171

172



173

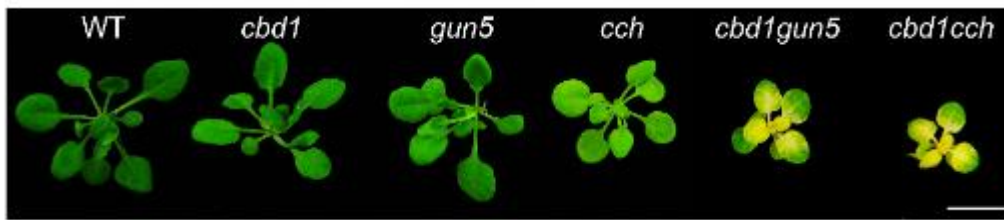

174 **Supplemental Figure 8. Double Mutant *cbd1gun5* and *cbd1cch* Exhibits the Same**  
175 **Phenotype.**

176 3-week-old WT and mutant lines grown in half-strength MS medium. Scale bar, 1 cm.

177

178

179

180

181

182

183

184

185

186

187

188

189

190

191

192

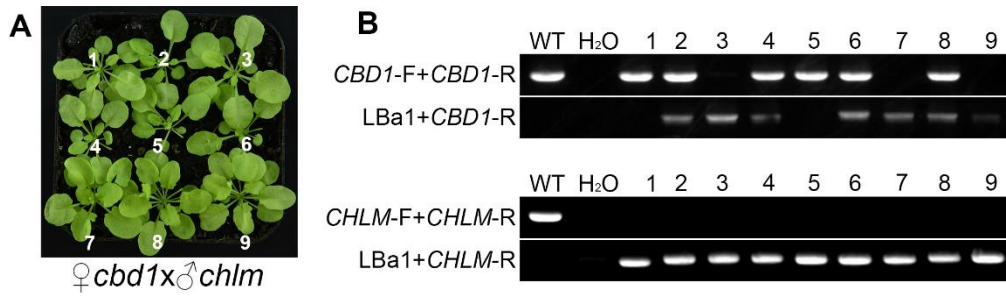

193 **Supplemental Figure 9. Identification and phenotype of *cbd1chlm* double**  
 194 **mutant.**

195 (A) Nine *cbd1chlm* double mutant lines grown in soil in greenhouse. (B) PCR  
 196 amplification of *CBD1* and *CHLM* genomic fragment from WT and the nine mutant  
 197 lines. Primer pair *CBD1*-F and *CBD1*-R was used to amplify genomic fragment of  
 198 *CBD1*. Primer pair *CBD1*-R and LBa1 (the T-DNA left border flanking sequence) was  
 199 used to identify T-DNA insertion in *CBD1*. Primer pair *CHLM*-F and *CHLM*-R was  
 200 used to amplify genomic fragment of *CHLM*. Primer pair LBa1 and *CHLM*-R was  
 201 used to identify T-DNA insertion in *CHLM*. Wild type (WT) was used as a positive  
 202 control and water was used as a negative control (H<sub>2</sub>O).

203  
 204  
 205  
 206  
 207  
 208  
 209  
 210  
 211  
 212  
 213  
 214  
 215  
 216

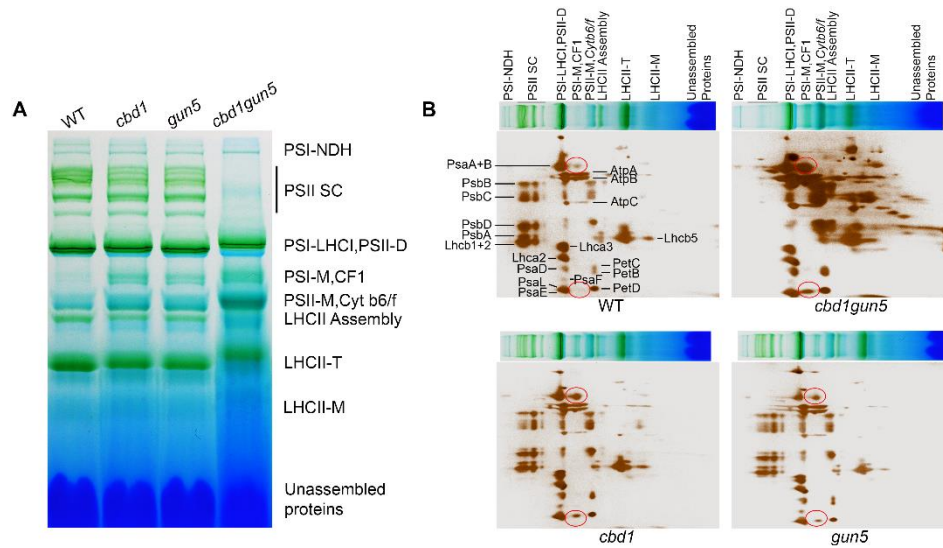

218 **Supplemental Figure 10. Disturbed Organization of Thylakoid Membrane**  
 219 **Protein Complexes in Mutants.**

220 (A) BN-PAGE analysis of equal thylakoid proteins (10  $\mu$ g chlorophyll) of 3-week-old  
 221 WT, *cbd1*, *gun5*, and *cbd1gun5* grown in half-strength MS. Thylakoid membranes  
 222 were solubilized with 1% DM by 5%-13.5% gradient gel. Designation of thylakoid  
 223 membrane protein complexes are labeled to the right. Six biological replicates were  
 224 performed and a representative one is shown. (B) 2D-SDS-PAGE fractionation of  
 225 thylakoid membrane protein complexes. After separation in the non-denaturing  
 226 gradient gel in the first dimension, the gels were sliced and laid on the top of the  
 227 denaturing 12.5% 2D SDS-PAGE gel for the further separation in the second  
 228 dimension. The followed silver stain was applied for the visualization of specific  
 229 proteins. The red oval circle indicates the location of PsaA+B and Psa E proteins.

230

231

232

233

234

235

236

237  
238  
239  
240  
241  
242  
243  
244  
245  
246  
247  
248  
249  
250  
251  
252  
253  
254  
255  
256  
257  
258  
259  
260  
261  
262  
263  
264

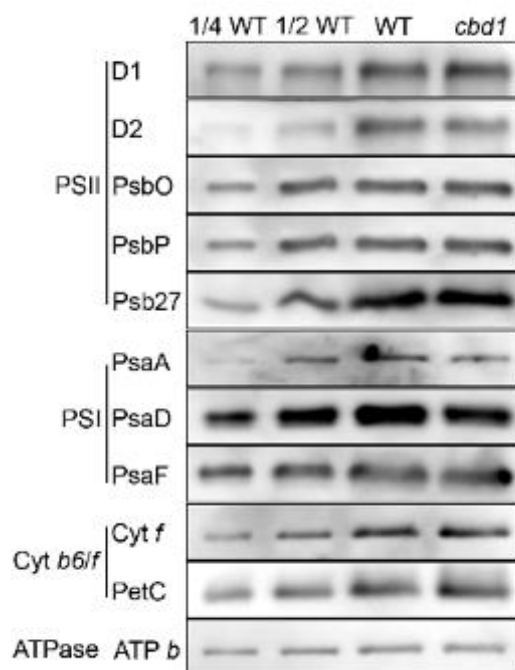

**Supplemental Figure 11. Immunoblotting Analysis of Subunits in Photosynthetic Supercomplexes.**

SDS-PAGE immunoblotting analysis of thylakoid proteins (1  $\mu$ g chlorophyll) from WT and *cbd1*. Antibodies were applied as indicated.

265

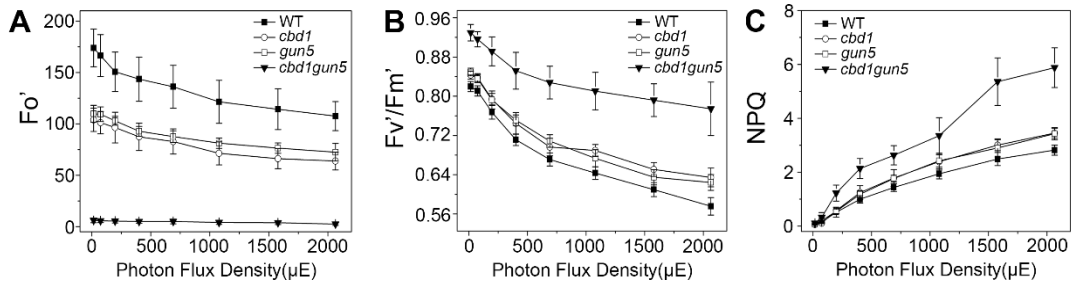

266

267 **Supplemental Figure 12. Photosynthetic Activity of PSII in WT, *cbd1*, *gun5*, and**  
268 ***cbd1gun5*.**

269 Chlorophyll *a* fluorescence parameters of 3-week-old WT, *cbd1*, *gun5*, and *cbd1gun5*.  
270 Plants were dark-adapted for 40 min before measurement. **(A)**  $F_o'$ : the minimal  
271 fluorescence; **(B)**  $F_v'/F_m'$ : the PSII maximum efficiency; **(C)** NPQ: the  
272 non-photochemical quenching. Data are mean  $\pm$  SD. n = 5.

273

274

275

276

277

278

279

280

281

282

283

284

285

286

287

288

289  
290  
291  
292  
293  
294  
295  
296  
297  
298  
299  
300  
301  
302  
303  
304  
305  
306  
307  
308  
309  
310  
311  
312  
313  
314  
315  
316  
317

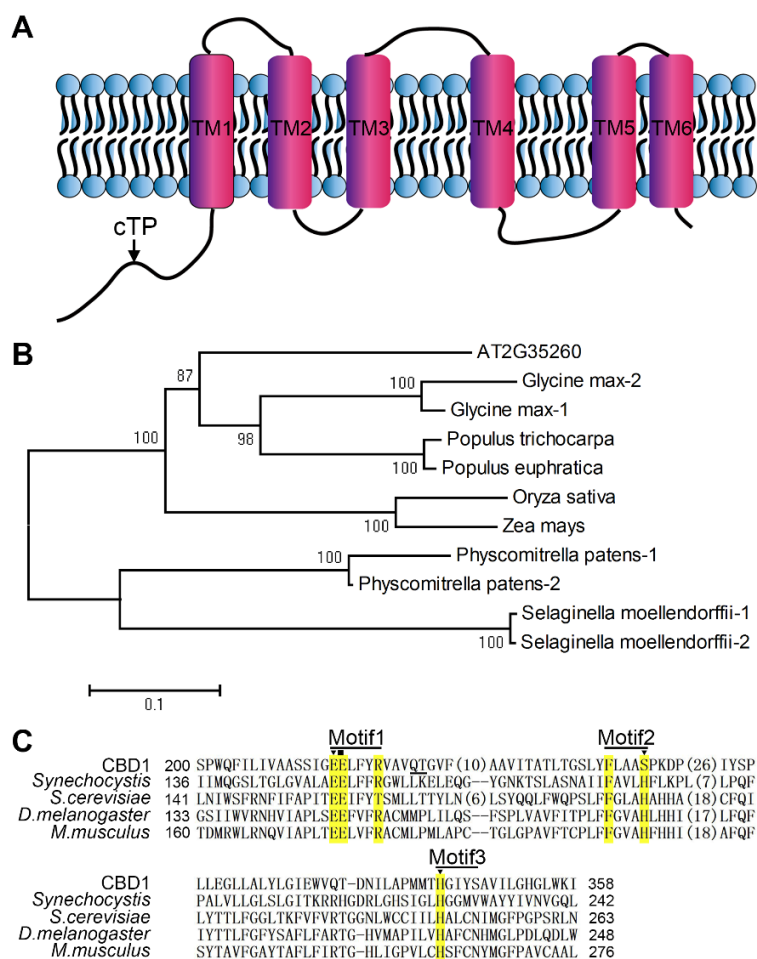

**Supplemental Figure 13. Phylogenetic Analysis of CBD1.**

(A) Predicted topology structure for CBD1 based on the TMHMM Server v.2.0. (<http://www.cbs.dtu.dk/services/TMHMM/>). (B) The phylogenetic tree was constructed using the Neighbor-Joining method based on the Poisson model of MEGA 6. Bootstrap values (1000 replicates) were shown for corresponding nodes. The analysis involved 11 amino acid sequences (*Arabidopsis thaliana*, AT2G35260; *Populus euphratica*, XP\_011018585.1; *Populus trichocarpa*, XP\_006368412.1; *Oryza sativa*, XP\_015633215.1; *Glycine max*, NP\_001239886.1; *Glycine max*, KRH77201.1; *Physcomitrella patens*, XP\_001769984.1; *Physcomitrella patens*, XP\_001764584.1; *Selaginella moellendorffii*, XP\_002967687.1; *Selaginella moellendorffii*, XP\_002964348.1; *Zea mays*, NP\_001137056.1). (C) Multiple sequence alignment of CBD1 with its Type II CAAX homologues (Pei and Grishin, 2001).

318

319 **Supplemental Table 1. Metal Ion Content Analysis**

320

321

| <b>Genotype</b>    | <b>Fraction</b> | <b>Fe</b> | <b>Mn</b> | <b>Cu</b>  | <b>Ca</b>  |
|--------------------|-----------------|-----------|-----------|------------|------------|
| <b>WT</b>          | Leaf            | 0.13±0.02 | 0.11±0.02 | 0.02±0.002 | 28.23±1.19 |
| <i><b>cbd1</b></i> | Leaf            | 0.13±0.01 | 0.11±0.01 | 0.02±0.001 | 29.24±2.25 |
| <b>WT</b>          | Thylakoid       | 7.16±1.81 | 1.58±0.06 | 0.54±0.02  | 15.10±5.14 |
| <i><b>cbd1</b></i> | Thylakoid       | 6.99±1.77 | 1.22±0.02 | 0.49±0.03  | 13.16±2.30 |

322 Metal ion contents were measured for leaves of wild-type and *cbd1* plants grown on  
323 soil as well as for intact thylakoids isolated from these plants. Values indicate amounts  
324 of metal ions ( $\mu\text{g}/\text{mg}$  dry weight for leaf fractions,  $\mu\text{g}/10^9$  thylakoids for intact  
325 thylakoids). All values are averages of four replicates  $\pm$ SD.

326

327

328

329

330

331

332

333

334

335

336

337

338

339

340

341

342

343

344 **Supplemental Table 2. Primers Used in This Study**

345

| <b>Primer Name</b> | <b>Prime Sequence (5'-3')</b>            | <b>Application</b>       |
|--------------------|------------------------------------------|--------------------------|
| CBD1-F             | CGGGATCCATGGAGCTTCCGTTACTCTCGTAG         | Mutant identification    |
| CBD1-R             | GGAATTCTTAAATCAACTTATCCGTGGCCTCCG        |                          |
| Lba1               | TGGTTCACGTAGTGGGCCATCG                   |                          |
| gun5-point-F       | GGTGGTCATGGACAACGAAC                     |                          |
| gun5-point-R       | CCAAAGAACCTGCCCAAGAG                     |                          |
| chlm-F             | GCTTTCAGACTGTGTTCCAATTG                  |                          |
| chlm-R             | CCATAGCAGCAGAAATATCGG                    |                          |
| CBD1-genomic-F     | CGGGATCCTGCTAAGTATTTTTAGTTTACCTAG        | Genomic complementation  |
| CBD1-genomic-R     | CGCTGCAGGCAGGGCACAAAGCAC                 |                          |
| CBD1-GFP-F         | GGAATTCGATGGAGCTTCCGTTACTCTCGTAG         | Subcellular localization |
| CBD1-GFP-R         | CGGGATCCGCAATCAACTTATCCGTGGCCTCCG        |                          |
| CBD2-GFP-F         | GGAATTCGATGGGTCTTCCTTTATTGTCTTGTAGTTCC   |                          |
| CBD2-GFP-R         | CGGGATCCGCTCTTGAGTTGTTGTCACCTTCAGTTTCAAG |                          |
| PAA2-GFP-F         | CGGGTACCATGGCGAGCAATCTTCTCC              |                          |
| PAA2-GFP-R         | CGCCCGGGTAGATGCTTGAAGCTTTGCTCTTT         |                          |
| PIC1-GFP-F         | CGCTCGAGATGCAATCACTACTCTTGCCG            |                          |
| PIC1-GFP-R         | CGGGATCCAGAGCAACCTTAGGAACTACGAC          |                          |
| OEP7-GFP-F         | CGCTCGAGATGGGAAAACTTCGGGAGC              |                          |
| OEP7-GFP-R         | CGGGATCCAGCAAACCTCTTTGGATGTGG            |                          |
| RBCS1-GFP-F        | CGCTCGAGATGGCTTCCTCTATGCTCTC             |                          |
| RBCS1-GFP-R        | CGGGATCCACACCGGTGAAGCTTGGTGG             |                          |
| CBD1pro-F          | CCCAAGCTTTGCTAAGTATTTTTAGTTTACCTAG       |                          |
| CBD1pro-R          | CGGGATCCTGAAGTTATTCGAAGTAACCG            |                          |
| CBD2pro-F          | CCCAAGCTTCTTTGTAATAAAGCAATTTAATGATG      |                          |
| CBD2pro-R          | CGGGATCCTTATAACATGCGACAACTCTCAG          |                          |



|                           |                                            |                              |
|---------------------------|--------------------------------------------|------------------------------|
| CBD1-M-F                  | GGAATTCATGGAGCTTCCGTTACTCTCG               | MM281<br>complementa<br>tion |
| CBD1-M-R                  | CGGGATCCTTAAATCAACTTATCCGTGGCCT<br>CC      |                              |
| CBD1-Q-F                  | ACGGAGCAGTGAAGGGATTG                       | qRT-PCR                      |
| CBD1-Q-R                  | TCAACGGTGGTGGAGTTAGC                       |                              |
| CBD2-Q-F                  | TTGACTGGACTCTTGCCACC                       |                              |
| CBD2-Q-R                  | GAGAGAACCAGTGAGAGCGG                       |                              |
| GUN4-Q-F                  | CACTTACCGCTCACAAACGC                       |                              |
| GUN4-Q-R                  | GCTCCTACTCCTGCCTGTTT                       |                              |
| CHLI-1-Q-F                | ACCCGGCGAGGTTTATCTTG                       |                              |
| CHLI-1-Q-R                | GCTTGTCCTGCTCGGTTTTG                       |                              |
| CHLI-2-Q-F                | GCTGCATCTGGTTGGAACAC                       |                              |
| CHLI-2-Q-R                | TTAACTCTCAGCTCGGCGTC                       |                              |
| CHLD-Q-F                  | TCCCTCCCCAAACGAAACAG                       |                              |
| CHLD-Q-R                  | AGGGAAAAACTGTCGGCCAT                       |                              |
| CHLH-Q-F                  | GCTTACCTCGCTTCTTGGGT                       |                              |
| CHLH-Q-R                  | CCACCAACTTCAGGCACTCT                       |                              |
| CHLM-Q-F                  | CGTTTGCTCCTTCCTTGTTGTC                     |                              |
| CHLM-Q-R                  | CCGAGTACGGCGATTGTTGT                       |                              |
| CRD1-Q-F                  | CCCAAAGCTCTCAAACCCGA                       |                              |
| CRD1-Q-R                  | TCGTTCCCTTCTTGGACTTCG                      |                              |
| Actin2-F                  | ACTCTCCCGCTATGTATGTCGCC                    |                              |
| Actin2-R                  | ATTTCCCGCTCTGCTGTTGTGGT                    |                              |
| CBD2 <sub>CRISPR</sub> -F | CGTGTAGACATGCAAAGTGGT                      | CRISPR                       |
| CBD2 <sub>CRISPR</sub> -R | CCTTCTTACAGACATGTGCC                       |                              |
| CBD2gRT1+                 | CCTGAATCCATTCAAAGCCGGTTTTAGAGCT<br>AGAAAT  |                              |
| CBD2gRT2+                 | GATCGACGACGGAGATGCGGGTTTTAGAGC<br>TAGAAAT  |                              |
| CBD2gRT3+                 | GGGAGACTTTGGACCGTTGGAGTTTTAGAGCT<br>AGAAAT |                              |
| CBD2-AtU6-2<br>9-T1       | CGGCTTTGAATGGATTTCAGGCAATCTCTTAG<br>TCGACT |                              |
| CBD2-AtU3b-<br>T2         | CCGCATCTCCGTCGTCGATCTGACCAATGTT<br>GCTCC   |                              |
| CBD2-AtU3d-<br>T3         | TCCAACGGTCCAAAGTCTCCTGACCAATGGT<br>GCTTTG  |                              |
